# Supplementary material
Source: HighWire-hosted journal article supplement (https://jnm.snmjournals.org/highwire/filestream/95369/field_highwire_adjunct_files/0/213678_Supplemental_Data.pdf)
Supplement: 213678_Supplemental_Data.pdf [file 213678_Supplemental_Data.pdf]

**Supplemental Table 1.** Point estimates (p-values) from multivariable analyses on all 6 endpoints after variance inflation factor analysis and backward variable selection ( $p_{\text{stay}}=0.7$ )

|                                           | Right choroid plexus                  |                                  | Left choroid plexus                   |                                  | Epithalamus                           |                                  |
|-------------------------------------------|---------------------------------------|----------------------------------|---------------------------------------|----------------------------------|---------------------------------------|----------------------------------|
|                                           | SUVmean<br>(adj.R <sup>2</sup> =0.40) | HU<br>(adj.R <sup>2</sup> =0.14) | SUVmean<br>(adj.R <sup>2</sup> =0.41) | HU<br>(adj.R <sup>2</sup> =0.08) | SUVmean<br>(adj.R <sup>2</sup> =0.15) | HU<br>(adj.R <sup>2</sup> =0.24) |
| Age (Years)                               | 0.01<br>(<0.0001)                     | 1.58<br>(0.002)                  | 0.01<br>(<0.0001)                     | 1.69<br>(0.007)                  | 0.002<br>(0.001)                      | 0.16<br>(0.89)                   |
| Male gender                               | -0.12<br>(0.11)                       | 0.82<br>(0.96)                   | -0.06<br>(0.28)                       | -5.20<br>(0.82)                  | 0.01<br>(0.59)                        | 8.09<br>(0.84)                   |
| BMI (Kg/m <sup>2</sup> )                  | -0.009<br>(0.29)                      | -0.97<br>(0.60)                  | -0.007<br>(0.36)                      | -1.47<br>(0.56)                  | 0.004<br>(0.20)                       | -6.08<br>(0.17)                  |
| BP (mm Hg)                                |                                       |                                  |                                       |                                  |                                       |                                  |
| Systolic                                  |                                       | 0.27<br>(0.51)                   | -0.002<br>(0.31)                      | 0.19<br>(0.67)                   | -0.0005<br>(0.47)                     | 2.46<br>(0.004)                  |
| Diastolic                                 |                                       |                                  |                                       |                                  |                                       |                                  |
| Creatinine<br>(mmol/L)                    | 0.002<br>(0.43)                       |                                  |                                       | -0.51<br>(0.52)                  | 0.0006<br>(0.51)                      | 1.36<br>(0.35)                   |
| MDRD-eGFR<br>(mL/min/1.73m <sup>2</sup> ) |                                       |                                  |                                       |                                  |                                       |                                  |
| Serum blood<br>sugar (mmol/L)             | 0.06<br>(0.35)                        | 6.21<br>(0.66)                   | 0.04<br>(0.40)                        | 15.75<br>(0.36)                  |                                       | 35.39<br>(0.27)                  |
| HbA1c (mmol/L)                            |                                       |                                  |                                       | -1.24<br>(0.56)                  |                                       | 9.17<br>(0.018)                  |
| Fibrinogen<br>(mmol/L)                    |                                       |                                  | 0.007<br>(0.67)                       | -2.28<br>(0.68)                  | 0.009<br>(0.18)                       | -23.92<br>(0.022)                |
| WBC (10 <sup>9</sup> /L)                  |                                       |                                  |                                       | 2.09<br>(0.61)                   |                                       | 14.81<br>(0.054)                 |
| Triglyceride<br>(mmol/L)                  | 0.11<br>(0.01)                        |                                  | 0.10<br>(0.014)                       | 9.85<br>(0.43)                   | 0.007<br>(0.69)                       | -55.86<br>(0.017)                |
| Cholesterol<br>(mmol/L)                   |                                       |                                  |                                       |                                  |                                       |                                  |
| Total<br>LDL                              |                                       |                                  |                                       |                                  |                                       | -13.38<br>(0.44)                 |
| HDL                                       | -0.06<br>(0.36)                       | -17.40<br>(0.31)                 | -0.05<br>(0.40)                       | -14.10<br>(0.47)                 |                                       |                                  |
